# Supplementary material for: Moderate-Intensity Exercise Improves Mesenteric Arterial Function in Male UC Davis Type-2 Diabetes Mellitus (UCD-T2DM) Rats: A Shift in the Relative Importance of Endothelium-Derived Relaxing Factors (EDRF)
Source: MDPI journal article supplement (doi:10.3390/biomedicines11041129), 2023-04-08
Supplement: s1 [file s1]

**Supplementary Table S1.** Sensitivity ( $pD_2$ :  $-\log EC_{50}$ ), and maximum response ( $R_{max}$ ) to sodium nitroprusside (SNP) in mesenteric arteries from sedentary and exercise-trained control (CS and CE) and diabetic (DS and DE) rats.

| SNP | n | $pD_2(-\log EC_{50})$ | $R_{max}(\%)$   |
|-----|---|-----------------------|-----------------|
| CS  | 5 | $7.23 \pm 0.3$        | $89.89 \pm 4.9$ |
| CE  | 5 | $7.38 \pm 0.2$        | $96.88 \pm 2.1$ |
| DS  | 5 | $7.36 \pm 0.2$        | $91.16 \pm 1.2$ |
| DE  | 6 | $7.08 \pm 0.1$        | $87.78 \pm 2.0$ |

Data are expressed as mean  $\pm$  SEM; n=5-6 rats per group. Analyzed using one-way ANOVA followed by Tukey's post hoc test. NS, not significant.
