# Supplementary material for: Moderate-Intensity Exercise Improves Mesenteric Arterial Function in Male UC Davis Type-2 Diabetes Mellitus (UCD-T2DM) Rats: A Shift in the Relative Importance of Endothelium-Derived Relaxing Factors (EDRF)
Source: MDPI journal article supplement (doi:10.3390/biomedicines11041129), 2023-04-08
Supplement: s1 [file s1]

A.

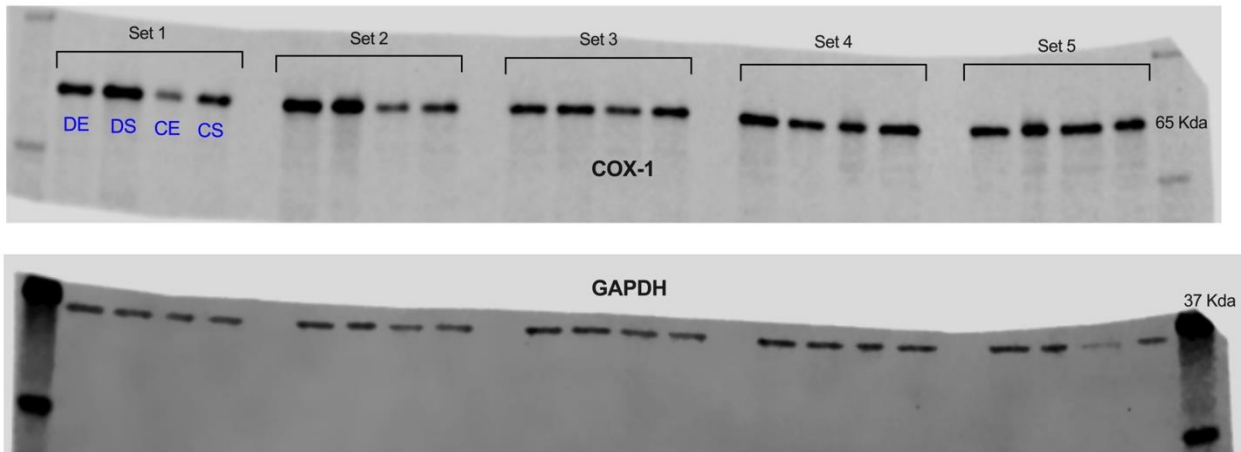

B.

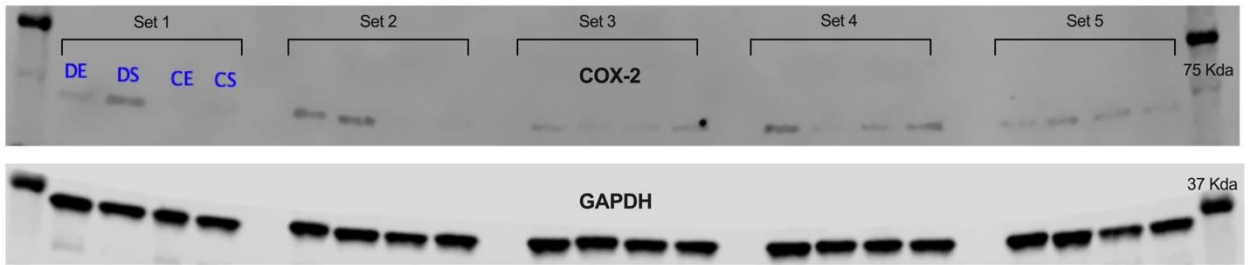

C.

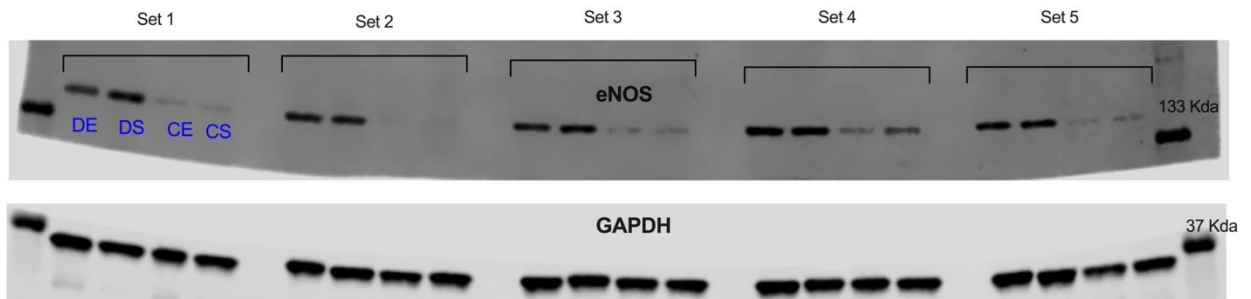

D.

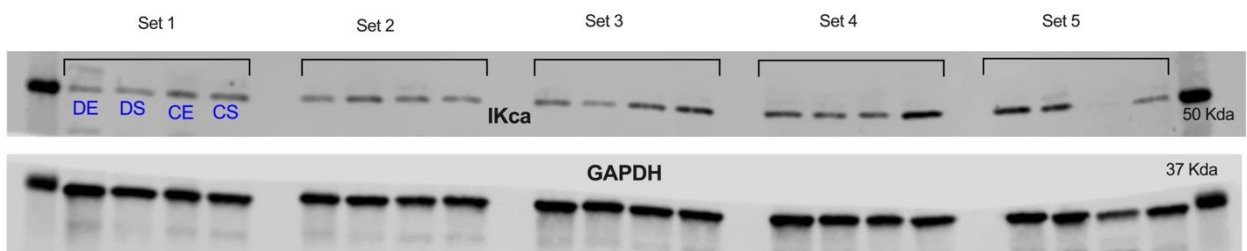

E.

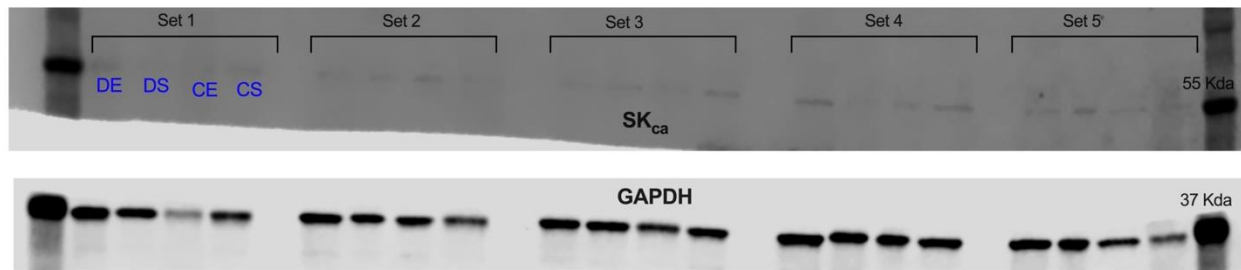

**Supplementary Figure S2:** Western blot analysis of (A) COX-1; (B) COX-2; (C) eNOS; (D) IK<sub>Ca</sub> and (E) SK<sub>Ca</sub> expressions in mesenteric arteries of sedentary and exercise-trained control (CS and CE) and diabetic (DS and DE) rats. Protein levels were quantified by densitometry and normalized to corresponding GAPDH (Please see **Figure 4A, 4B, 5, 6A and 6B** in Manuscript). n=3-5 animals per group. COX-1, cyclooxygenase-1; COX-2, cyclooxygenase-2; eNOS, endothelial nitric oxide synthase; IK<sub>Ca</sub>, intermediate conductance calcium activated potassium channel; SK<sub>Ca</sub>, small conductance calcium activated potassium channel. Figure B and C are from the same membrane. Thus, loading control (GAPDH) is the same and GAPDH image was reused in Figure B and C. Parts of these images were used in **Figure 4A, 4B, 5, 6A and 6B**.
