# Supplementary material for: Moderate-Intensity Exercise Improves Mesenteric Arterial Function in Male UC Davis Type-2 Diabetes Mellitus (UCD-T2DM) Rats: A Shift in the Relative Importance of Endothelium-Derived Relaxing Factors (EDRF)
Source: MDPI journal article supplement (doi:10.3390/biomedicines11041129), 2023-04-08
Supplement: s1 [file s1]

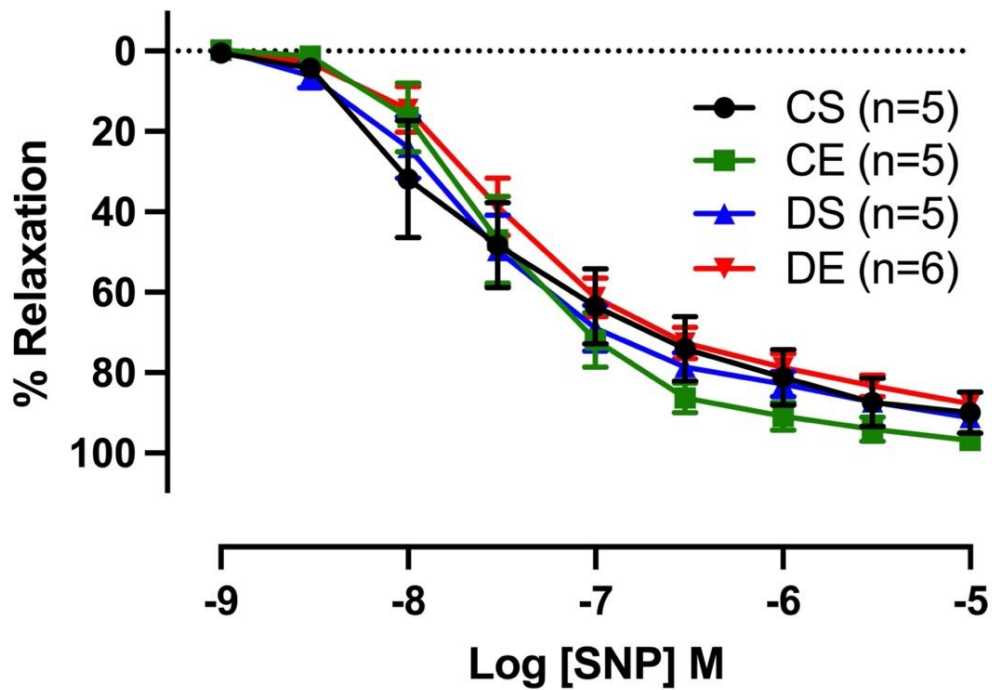

**Supplementary Figure S1.** Relaxation responses to cumulative concentrations of sodium nitroprusside (SNP,  $10^{-9}$  to  $10^{-5}$  M) in intact mesenteric arterial rings precontracted with phenylephrine (PE,  $2\mu\text{M}$ ) from sedentary and exercise-trained control (CS and CE) and diabetic (DS and DE) rats. Relaxation to SNP was measured in presence of indomethacin ( $10\mu\text{M}$ ), L-NAME ( $200\mu\text{M}$ ), apamin ( $1\mu\text{M}$ ) and TRAM-34 ( $1\mu\text{M}$ ). Data are expressed as mean  $\pm$  SEM.  $n=5-6$  animals per group, analyzed using two-way ANOVA with repeated measure followed by Tukey's post hoc test. NS, not significant.
